# Supplementary material
Source: Springer Nature journal article supplement (https://www.springermedizin.de/resource/supplementary/13023_2012_479_MOESM2_ESM.pdf/9642308)

**A**

1 year old

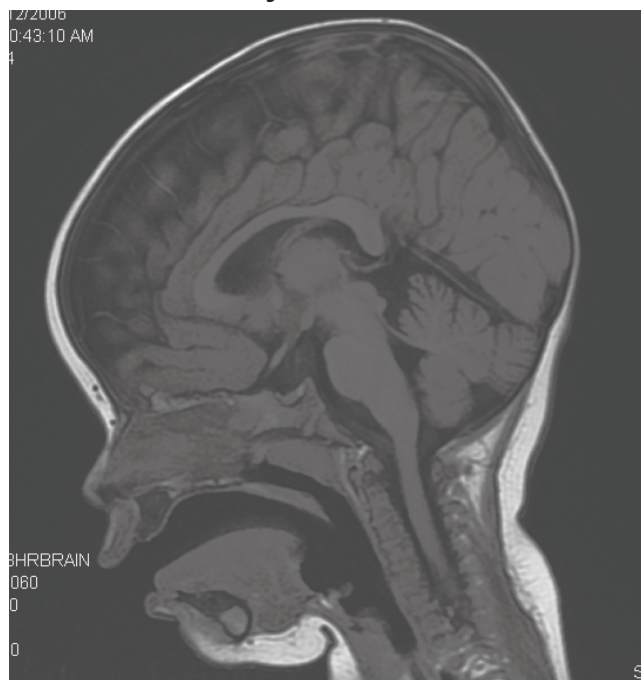**B**

5 years old

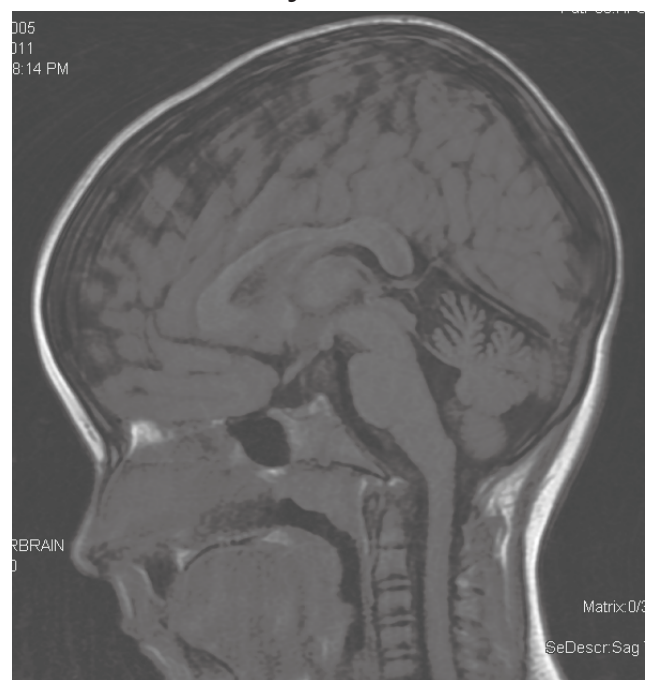**Proband of Family C****C**

Sagittal

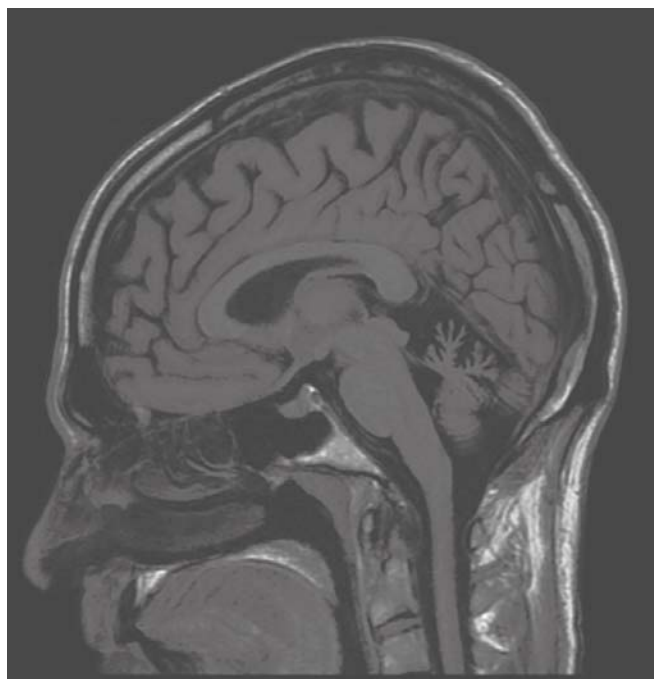**D**

Axial

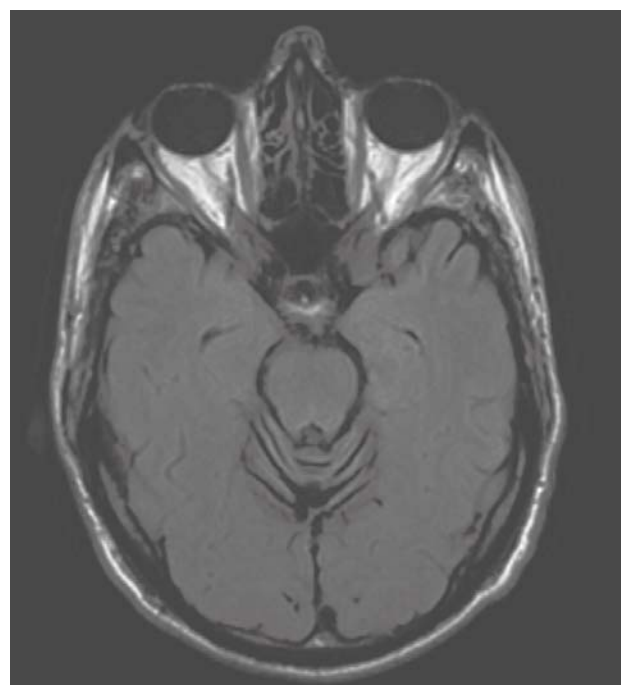**Father of the proband**

Supplement: MOESM2 [file 9642308]
